# Supplementary material for: Obesity does not promote tumorigenesis of localized patient-derived prostate cancer xenografts
Source: PubMed Central journal article supplement (PMC5216968; doi:10.18632/oncotarget.10258), 2016-06-23
Supplement: oncotarget-07-47650-s001.pdf [file oncotarget-07-47650-s001.pdf]

## Obesity does not promote tumorigenesis of localized patient-derived prostate cancer xenografts

### Supplementary Materials

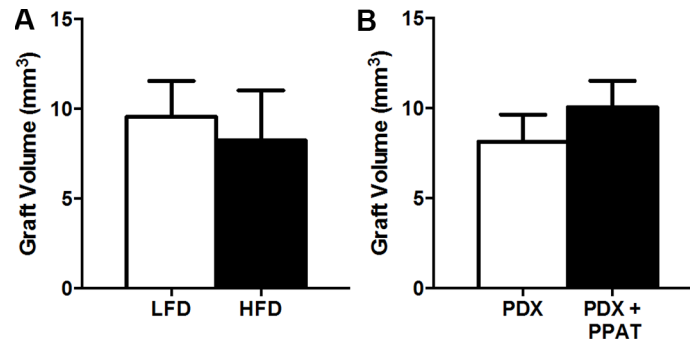

**Supplementary Figure S1: Graft volume of PDXs.** Graft volumes of harvested PDXs obtained from mice. (A) LFD vs. HFD ( $n = 3$  patients per group) and (B) PDX alone vs. PDX + PPAT ( $n = 3$  patients per group). Data are shown as mean  $\pm$  SEM.

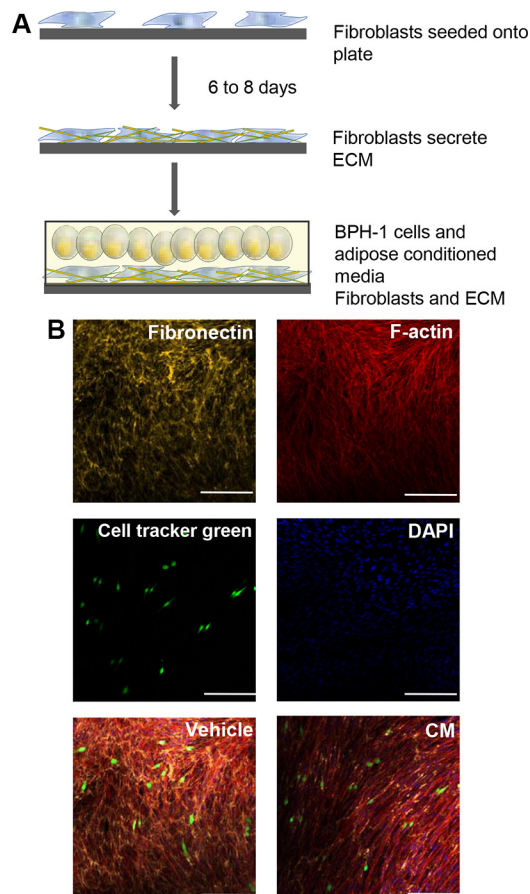

**Supplementary Figure S2: Establishment of the cellularized matrix in 3D co-culture model.** (A) Schematic representation of the co-culture model. Human primary stromal fibroblasts (normal prostatic fibroblasts) are plated and allowed to produce naturally occurring extracellular matrix proteins over 6–8 days. BPH-1 cells stained with cell tracker green dye are then culture on the stromal – matrix layer for 24 hours. PPAT condition media is added to the culture wells. (B) Immunofluorescent labelling of 3D co-culture components. Fibronectin staining of extracellular matrix secretions, immunofluorescent labelling of F-actin in fibroblasts, BPH-1 cells labelled with cell tracker green and DAPI staining of cell nuclei. Composite image of BPH-1 cells co cultured on cellularised matrix in vehicle media alone and with adipose conditioned media. Images are representative of all co-cultured. Scale bar = 50  $\mu$ m (B).

**Supplementary Table S1: Dietary information.** See Supplementary\_Table\_S1

**Supplementary Table S2: Details of primary and secondary antibody used for immunohistochemistry staining**

| <b>Primary Antibody</b> | <b>Clone</b> | <b>Supplier</b>       | <b>Species and isotype</b> | <b>Concentration used</b> |
|-------------------------|--------------|-----------------------|----------------------------|---------------------------|
| <b>AMACR</b>            | 13H4         | DAKO                  | Rabbit IgG                 | 0.55 µg/ml                |
| <b>AR</b>               | A9853        | Sigma Aldrich         | Rabbit IgG                 | 2.0 µg/ml                 |
| <b>CK8/18</b>           | NCL-L-5D3    | Novocastra            | Mouse IgG <sub>1</sub>     | 0.26 µg/ml                |
| <b>ERG</b>              | EPR3864      | AbCAM                 | Rabbit IgG                 | 3.26 µg/ml                |
| <b>Ki-67</b>            | MM1          | Novocastra            | Mouse IgG <sub>1</sub>     | 0.2 µg/ml                 |
| <b>MYC</b>              | Y69          | AbCAM                 | Rabbit IgG                 | 0.19 µg/ml                |
| <b>Nkx3.1</b>           | -            | Athena Enzyme Systems | Rabbit IgG                 | 0.67 µg/ml                |
| <b>p63</b>              | -            | AbCAM                 | Rabbit IgG                 | 0.25 µg/ml                |
| <b>PSA</b>              | A0562        | DAKO                  | Rabbit IgG                 | 1 µg/ml                   |
| <b>PTEN</b>             | -            | Cell Signalling       | Rabbit IgG                 | 0.06 µg/ml                |
